# Supplementary material for: Comparative Analysis of the Relative Fragmentation Stabilities of Polymorphic Alpha-Synuclein Amyloid Fibrils
Source: MDPI journal article supplement (doi:10.3390/biom12050630), 2022-04-25
Supplement: s1 [file s1]

# **Comparative analysis of the relative fragmentation stabilities of polymorphic alpha-synuclein amyloid fibrils**

## **SUPPLEMENTARY TABLE**

Sarina Sanami<sup>1</sup>, Tracey J. Purton<sup>1</sup>, David P. Smith<sup>2</sup>, Mick F. Tuite<sup>1</sup>, Wei-Feng Xue<sup>1\*</sup>

<sup>1</sup> Kent Fungal Group, School of Biosciences, Division of Natural Sciences, University of Kent,  
CT2 7NJ, Canterbury, UK; <sup>2</sup> Biomolecular Research Centre, Sheffield Hallam University,  
Sheffield, S1 1WB UK

\* Correspondence to: W.F.Xue@kent.ac.uk

Key words: atomic force microscopy / amyloid / fibril fragmentation / fibril division / image  
analysis / sonication

**Supplementary Table S1: Quantitative AFM image analysis statistics.** Image analysis

statistics for each fibril sample and sonication time point is shown.

|             | <i>Fragmentation<br/>sonication time / s</i> | <i>Number of<br/>images *</i> | <i>Mean particle<br/>length / nm</i> | <i>Number of fibril<br/>particles †</i> | <i>Mean particle<br/>height / nm</i> | <i>Number of<br/>Pixels ‡</i> |
|-------------|----------------------------------------------|-------------------------------|--------------------------------------|-----------------------------------------|--------------------------------------|-------------------------------|
| <b>WT</b>   | 10                                           | 3                             | 146.6                                | 2356                                    | 7.8                                  | 124094                        |
|             | 20                                           | 2                             | 159.7                                | 3402                                    | 8.0                                  | 194749                        |
|             | 40                                           | 1                             | 161.1                                | 2122                                    | 7.8                                  | 121437                        |
|             | 80                                           | 3                             | 91.0                                 | 11331                                   | 8.0                                  | 421682                        |
|             | 320                                          | 2                             | 61.0                                 | 8462                                    | 7.6                                  | 217270                        |
|             | 640                                          | 2                             | 56.9                                 | 8348                                    | 7.7                                  | 200526                        |
| <b>A30P</b> | 10                                           | 3                             | 232.3                                | 1675                                    | 6.4                                  | 90746                         |
|             | 20                                           | 1                             | 141.7                                | 1333                                    | 6.1                                  | 63378                         |
|             | 40                                           | 2                             | 91.3                                 | 3858                                    | 6.5                                  | 140956                        |
|             | 80                                           | 2                             | 92.3                                 | 3354                                    | 6.4                                  | 119481                        |
|             | 320                                          | 1                             | 68.3                                 | 2090                                    | 6.6                                  | 57942                         |
|             | 640                                          | 1                             | 71.0                                 | 2069                                    | 6.6                                  | 60023                         |
| <b>A53T</b> | 10                                           | 5                             | 587.5                                | 436                                     | 8.2                                  | 46284                         |
|             | 20                                           | 2                             | 354.9                                | 727                                     | 8.5                                  | 62580                         |
|             | 40                                           | 2                             | 344.2                                | 480                                     | 8.6                                  | 42181                         |
|             | 80                                           | 2                             | 237.4                                | 1447                                    | 7.2                                  | 94849                         |
|             | 320                                          | 3                             | 196.8                                | 2706                                    | 8.2                                  | 147446                        |
|             | 640                                          | 2                             | 117.8                                | 1911                                    | 8.6                                  | 75371                         |

\* All images are of 2048x2048 pixels covering 10 x 10  $\mu\text{m}$  surface areas.

† Total number of fibril particles quantified for constructing the fibril length distributions.

‡ Total number of pixel height values measured for constructing the fibril height distributions.
